# Supplementary material
Source: PubMed Central journal article supplement (PMC478562)
Supplement: pnas_101_28_10272__1.pdf [file pnas_101_28_10272__1.pdf]

X-ray  
Seq1  
NMR

MSKGP**AV**GID LGTTY**SCVGV** FQH**GKVEIIA** NDQGN**R**TT**PS** Y**VA**FTD**TER**LIG**DAAKNQVA**

61

M**NPTNTV**FDA KRLIG**RR**FDD **AVVQSDMK**HW P**FM**V**VND**AGR PK**VQV**E**YKGE** TKS**F**Y**PEEVS**

121

**SMV**LTKMKEI A**EAY**L**GKT**VT NAVVT**VPAYF** N**DSQR**QATKD AG**TIAG**LNVL RI**INEPTAA**

181

I**AYGL**DK**KVG** A**ERN**VLIFDL **GGGTFD**VSIL T**IEDG**IF**EVK** ST**AGD**TH**LG** **EDF**DNRMVNH

241

F**IAE**FKR**HK** K**DI**SEN**KRAV** RRL**RTAC**ERA **KRTL**SS**STQA** **SIEID**SL**YEG** ID**FYTS**ITRA

301

R**FEE**LN**ADLF** R**GTLD**P**VEKA** LR**DAK**L**DKSQ** **IHDIV**L**VG**GS **TRIP**K**IQKLL** Q**DFF**NG**KELN**

361

KS**INP**DE**AVA** Y**GAAV**QA**AIL** **SGDK**SE
